# Supplementary material for: Preparation and characterization of alginate/HACC/oyster shell powder biocomposite scaffolds for potential bone tissue engineering applications
Source: Royal Society of Chemistry journal article supplement (doi:10.1039/c5ra26805b), 2016-01-01
Supplement: c5ra26805b1.pdf [file c5ra26805b1.pdf]

The over high amount of the heavy metal ions might bring the toxicity, and the component for the oyster shell powder determined by EDS.

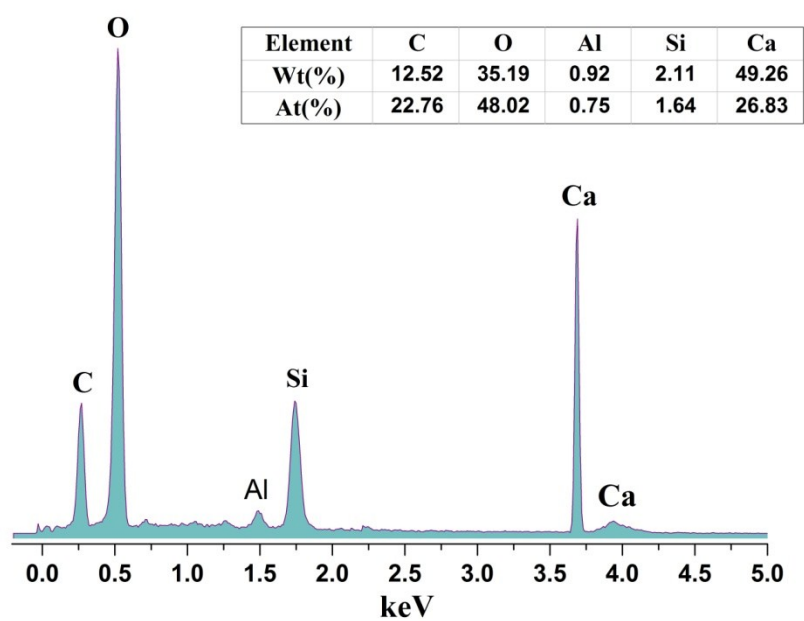

The energy dispersive X-ray spectroscopy of the oyster shell powder
